# Supplementary material for: TBD-catalyzed anionic ring-opening polymerization of hexamethylcyclotrisiloxane: a new route for the controlled synthesis of PDMS
Source: Royal Society of Chemistry journal article supplement (doi:10.1039/d4py01254b), 2024-12-05
Supplement: d4py01254b1.pdf [file d4py01254b1.pdf]

# TBD-catalyzed anionic ring-opening polymerization of hexamethylcyclotrisiloxane: a new route for controlled synthesis of PDMS

Alice Corfa, Sylvain Caillol, Julien Pinaud\*, Vincent Ladmiral\*

ICGM, Univ Montpellier, CNRS, ENSCM, Montpellier, France.

## Supporting information

### Content

|                                                                                                                                                                           |   |
|---------------------------------------------------------------------------------------------------------------------------------------------------------------------------|---|
| 1. First order kinetic plots.....                                                                                                                                         | 2 |
| 1. Trimethylsilanol initiated ROP.....                                                                                                                                    | 2 |
| Figure S1. SEC traces of PDMS obtained from the trimethyl silanol initiated AROP of D <sub>3</sub> : a) entry 1 and b) entry 2 (Table1). .....                            | 2 |
| 2. Benzyl alcohol initiated ROP.....                                                                                                                                      | 2 |
| Figure S2. SEC traces of PDMS obtained from the benzyl alcohol-initiated AROP of D <sub>3</sub> : a) entry 3 and b) entry 4 (Table 1). .....                              | 2 |
| Figure S4. <sup>1</sup> H NMR spectra to see the consumption of TMSOH as initiator compared to BzOH as initiator for [M]/[OH]/[A]=25/1/0.5 (Entry 2 and 4 (Table 1))..... | 3 |
| 3. Diphenylsilane diol initiated ROP .....                                                                                                                                | 3 |
| Figure S5. SEC traces of PDMS obtained from diphenyl silane diol-initiated AROP of D <sub>3</sub> : a) entry 5 and b) entry 6 (Table 1). .....                            | 3 |
| Figure S5. MALDI-TOF mass spectra of propane diol-initiated PDMS entry 6 (Table 1).....                                                                                   | 4 |
| 4. Propane diol initiated ROP .....                                                                                                                                       | 4 |
| Figure S6. SEC traces of PDMS obtained from the propane diol-initiated AROP of D <sub>3</sub> : a) entry 7 and b) entry 8 (Table 1) .....                                 | 4 |
| Figure S7. MALDI-TOF mass spectra of propane diol-initiated PDMS entry 8 (Table 1). .....                                                                                 | 5 |
| 5. Polymerization of D <sub>4</sub> .....                                                                                                                                 | 5 |
| Figure S7. <sup>1</sup> H NMR spectra of the .....                                                                                                                        | 5 |

### 1. First order kinetic plots

Monomer conversion was determined by  $^1\text{H}$  NMR and apparent polymerization rates ( $k_{app}$ ) have been determined according to equation (1).

$$\ln\left(\frac{[M]_0}{[M]}\right) = k_{app}t \quad (1)$$

### 2. Trimethylsilanol initiated ROP

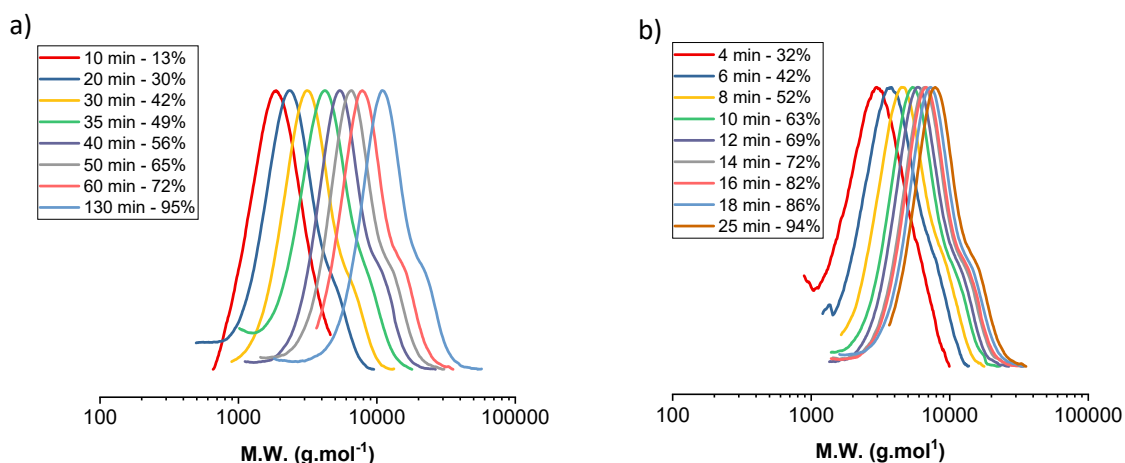

Figure S1. SEC traces of PDMS obtained from the trimethyl silanol initiated AROP of  $\text{D}_3$ : a) entry 1 and b) entry 2 (Table1).

### 3. Benzyl alcohol initiated ROP

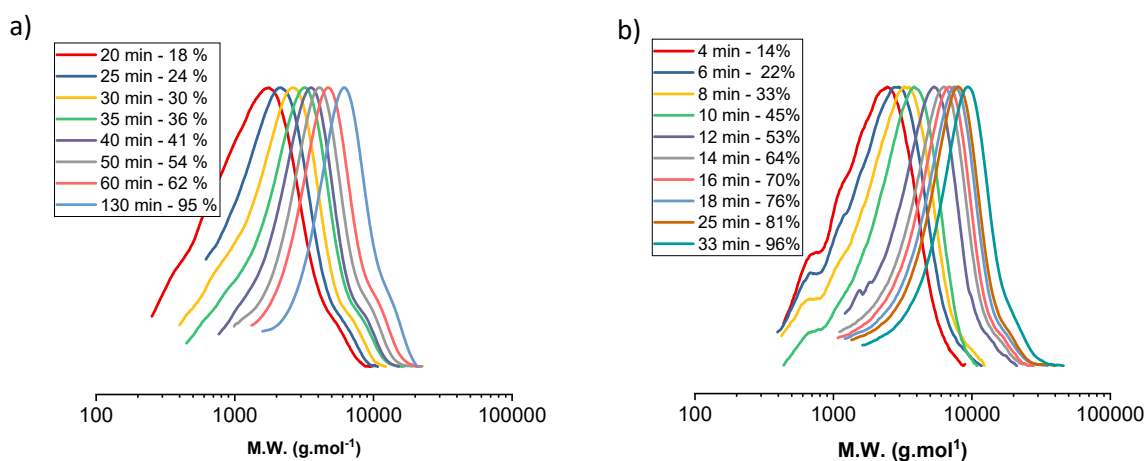

Figure S2. SEC traces of PDMS obtained from the benzyl alcohol-initiated AROP of  $\text{D}_3$ : a) entry 3 and b) entry 4 (Table 1).

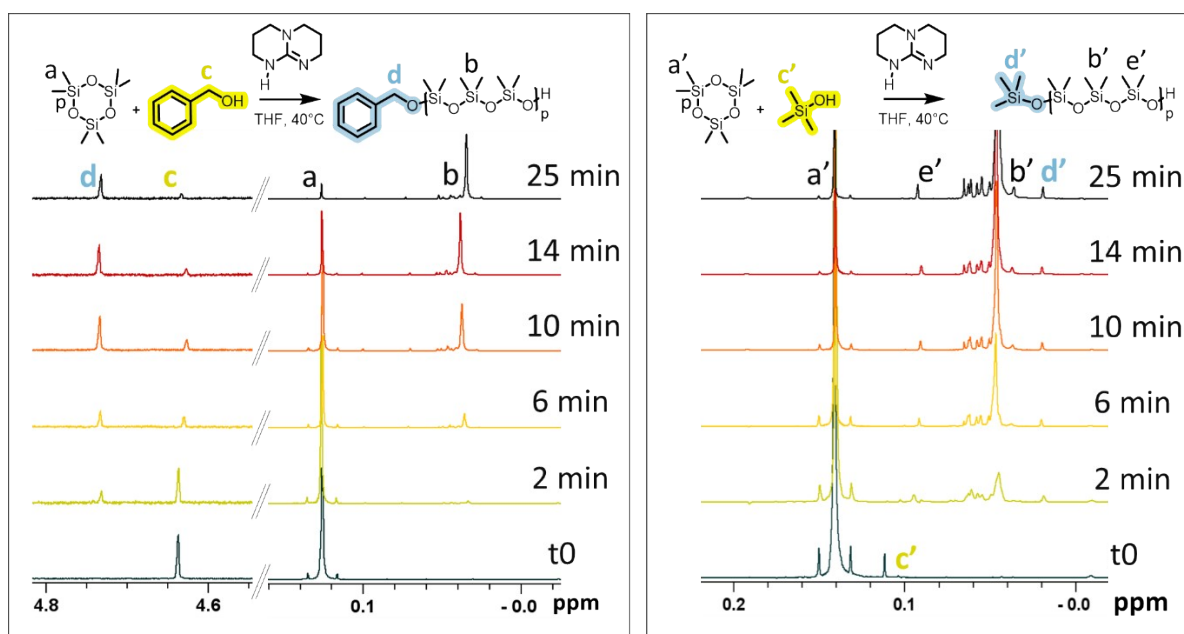

Figure S3.  $^1\text{H}$  NMR spectra to see the consumption of TMSOH as initiator compared to BzOH as initiator for  $[\text{M}]/[\text{OH}]/[\text{A}]=25/1/0.5$  (Entry 2 and 4 (Table 1))

#### 4. Diphenylsilane diol initiated ROP

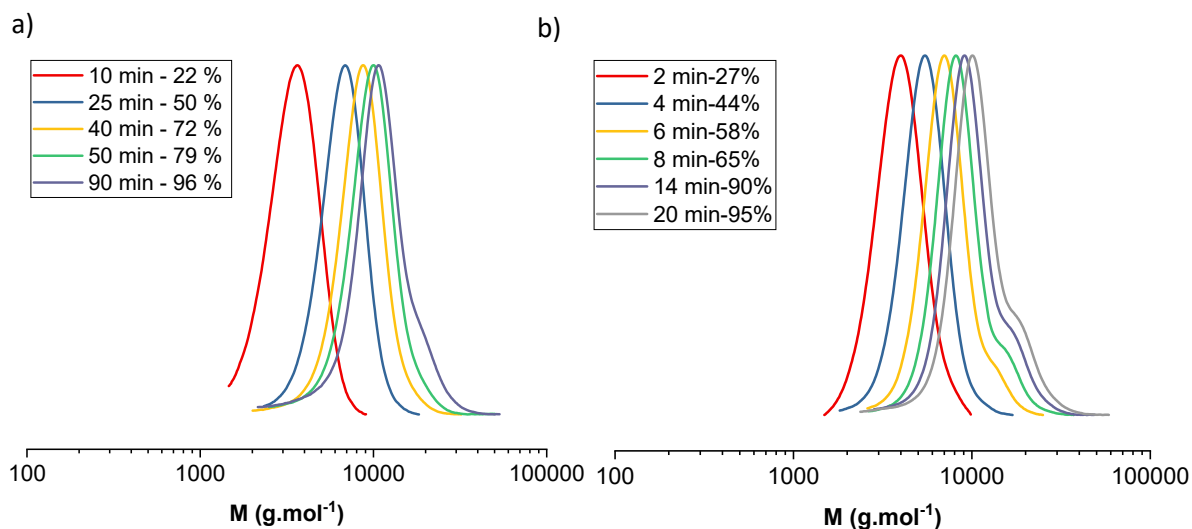

Figure S4. SEC traces of PDMS obtained from diphenylsilane diol-initiated AROP of  $\text{D}_3$ : a) entry 5 and b) entry 6 (Table 1).

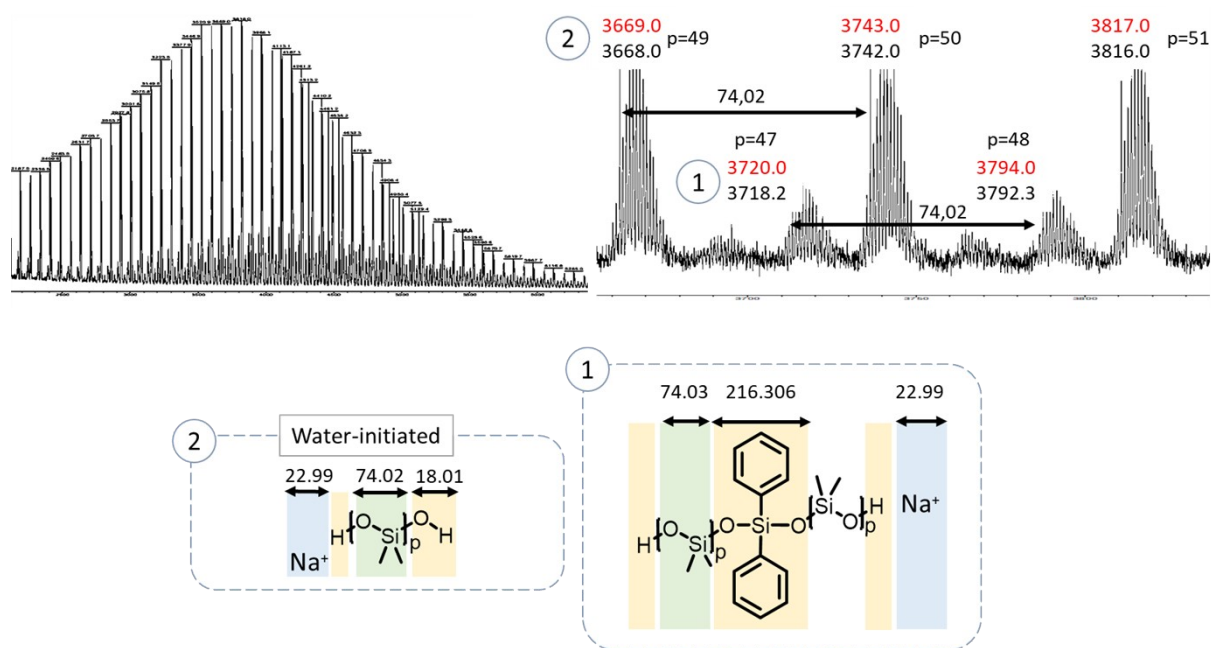

Figure S5. MALDI-TOF mass spectra of diphenylsilanediol-initiated PDMS entry 6 (Table 1).

## 5. Propane diol initiated ROP

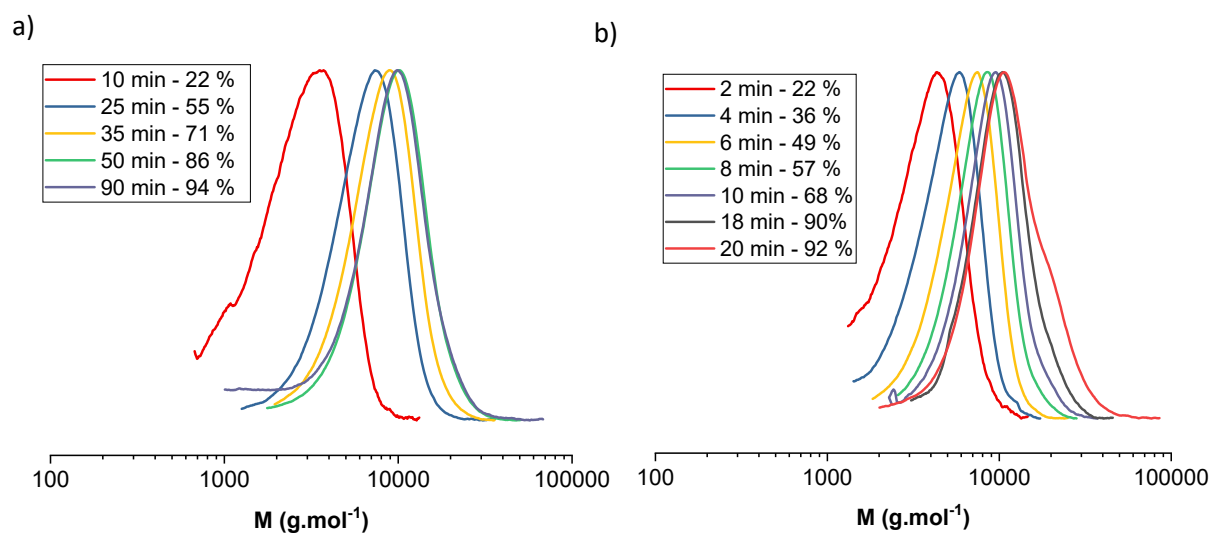

Figure S6. SEC traces of PDMS obtained from the propane diol-initiated AROP of  $D_3$ : a) entry 7 and b) entry 8 (Table 1)

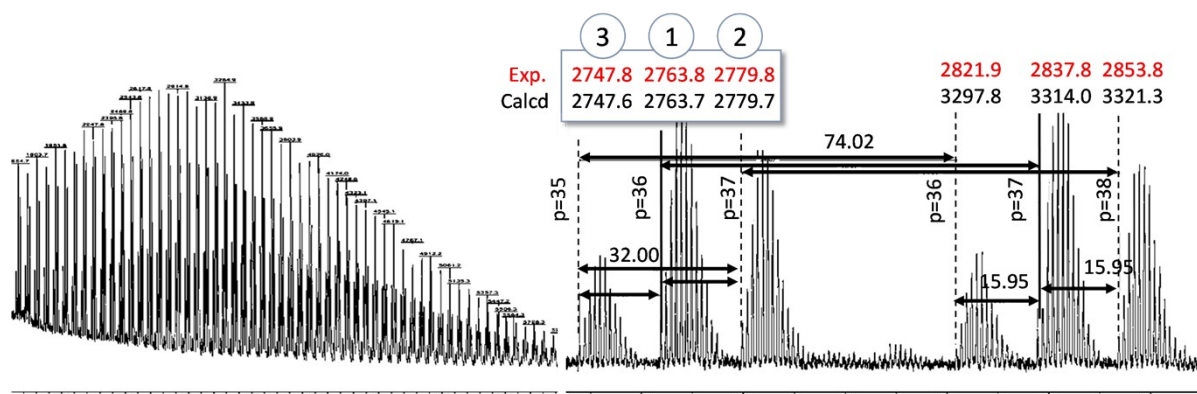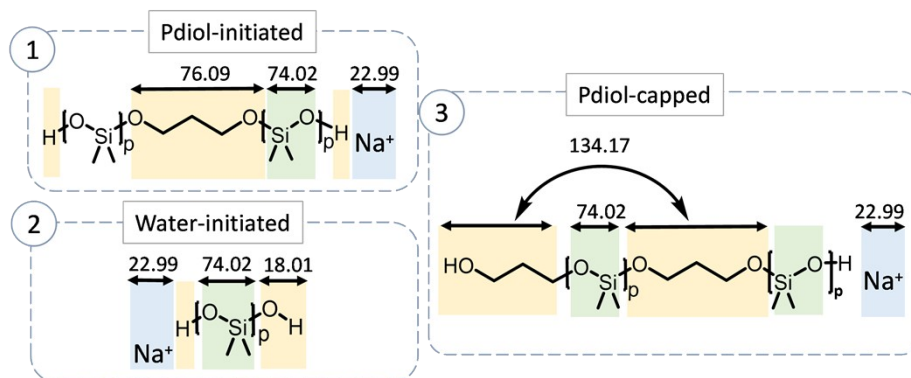

Figure S7. MALDI-TOF mass spectra of propanediol-initiated PDMS entry 8 (Table 1).

### 6. Polymerization of D<sub>4</sub>

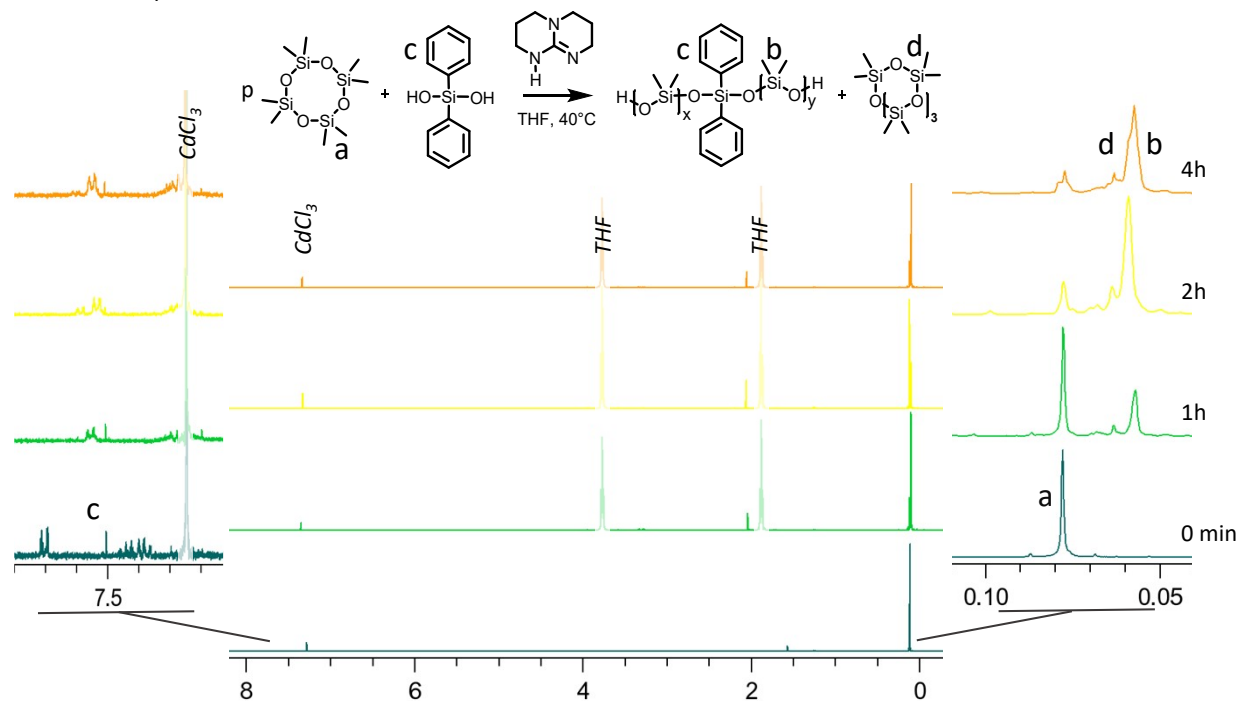

Figure S8. <sup>1</sup>H NMR spectra of the polymerization of D<sub>4</sub> (entry 2 of Table 3).
